# Supplementary material for: Ochratoxin A Induces Steatosis via PPARγ-CD36 Axis
Source: MDPI journal article supplement (doi:10.3390/toxins13110802), 2021-11-13
Supplement: s1 [file s1]

## Supplementary Materials: Ochratoxin A Induces Steatosis via PPAR $\gamma$ -CD36 Axis

Qian-Wen Zheng, Xu-Fen Ding, Hui-Jun Cao, Qian-Zhi Ni, Bing Zhu, Ning Ma, Feng-Kun Zhang, Yi-Kang Wang, Sheng Xu, Tian-Wei Chen, Ji Xia, Xiao-Song Qiu, Dian-Zhen Yu, Dong Xie and Jing-Jing Li

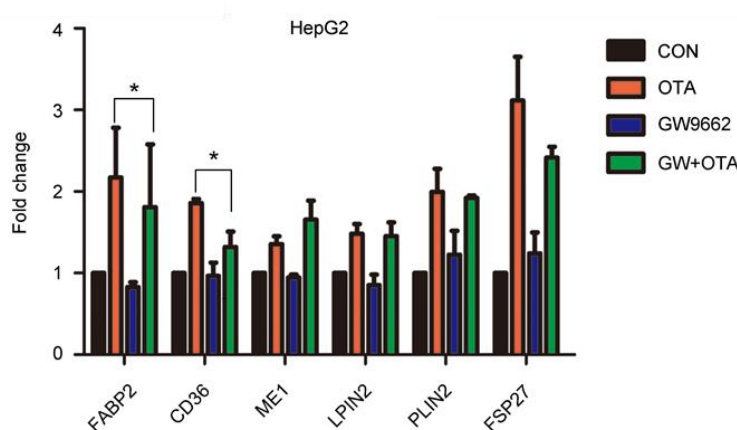

**Figure S1.** OTA affects PPAR $\gamma$  signaling. Fold change of gene mRNA expression by qPCR in HepG2 cells under indicated treatment ( $n = 6$  biological replicates). Data shown as the mean  $\pm$  S.E.M. \*  $P < 0.05$ .

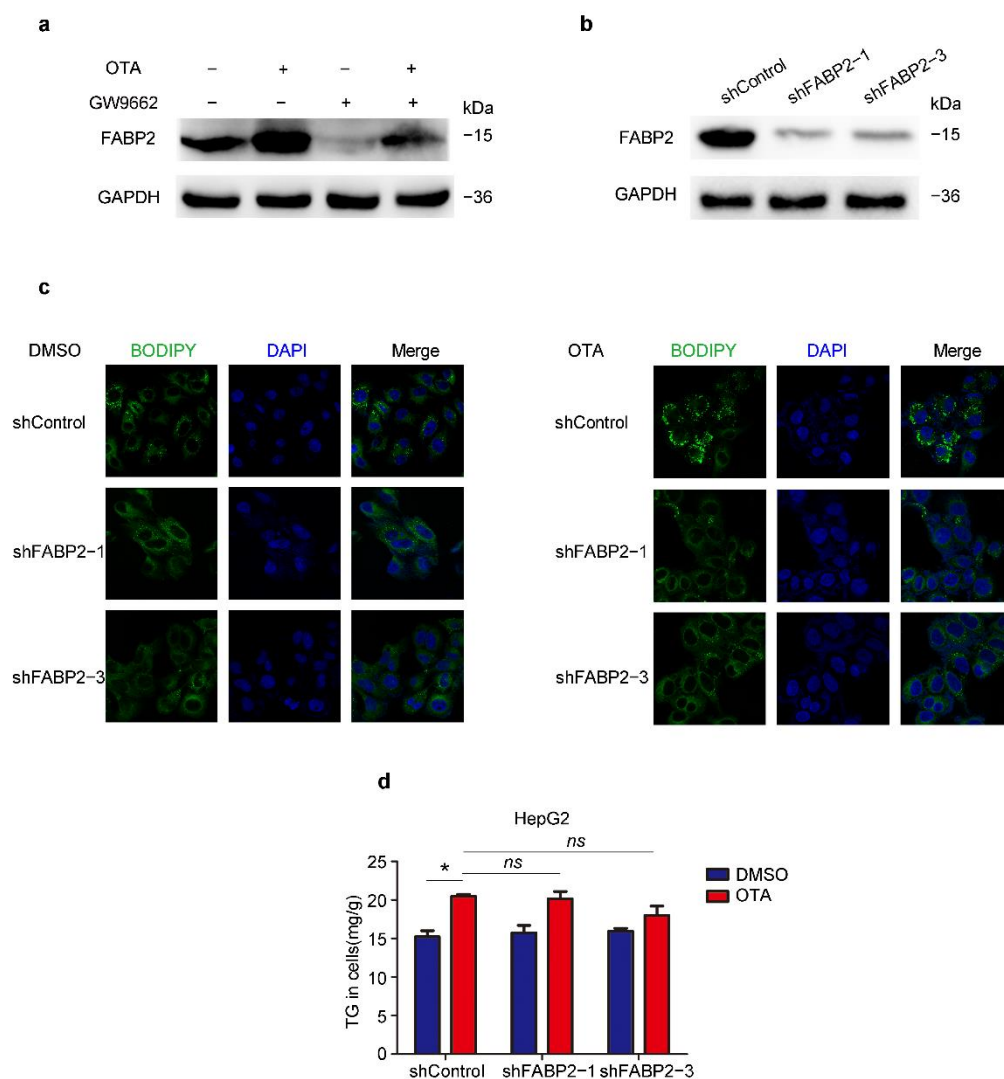

**Figure S2.** FABP2 is involved in the effect of OTA on lipid metabolism in liver cells. **(A)** Western blot analysis of FABP2 expression in HepG2 cells under indicated treatment. **(B)** Knockdown efficiency of FABP2 in HepG2 cells. **(C)** BODIPY staining of lipid droplets in control and FABP2-knockdown HepG2 cells treated with DMSO and OTA. **(D)** TG contents in control and FABP2-knockdown HepG2 cells treated with DMSO and OTA ( $n = 6$  biological replicates). Data shown as the mean  $\pm$  S.E.M. \*  $P < 0.05$ , *ns* means no significant difference.

Table S1. Primers of shRNA.

| Primers      | Sequence 5'→3'                                                                                                                    |
|--------------|-----------------------------------------------------------------------------------------------------------------------------------|
| CD36 shRNA2  | F: CCGGGCCATAATCGACACATATAAACTCGAGTTTATATGTGTCGATTATGGCTTTTGG<br>R: AATTCAAAAAGCCATAATCGACACATATAAACTCGAGTTTATATGTGTCGATTATGGC    |
| CD36 shRNA3  | F: CCGGACGGCTGCAGGTCAACCTATTCTCGAGAATAGGTTGACCTGCAGCCGTTTTTGG<br>R: AATTCAAAAACGGCTGCAGGTCAACCTATTCTCGAGAATAGGTTGACCTGCAGCCGTT    |
| FABP2 shRNA1 | F: CCGGTGGAGCCTTGAGGGAAATAAACTCGAGTTTATTTCCTCAAGGCTCCATTTTGG<br>R: AATTCAAAAATGGAGCCTTGAGGGAAATAAACTCGAGTTTATTTCCTCAAGGCTCCA      |
| FABP2 shRNA3 | F: CCGGCGAGAAATTATAGGTGATGAACCTCGAGTTCATCACCTATAATTTCTCGTTTTTGG<br>R: AATTCAAAAACGAGAAATTATAGGTGATGAACCTCGAGTTCATCACCTATAATTTCTCG |

Table S2. Primers for Real-Time PCR detection.

| Gene              | GenBank Accession Number     | Sequence 5'→3'                                          |
|-------------------|------------------------------|---------------------------------------------------------|
| Mouse Fabp2       | 14079                        | F: GCTGATTGCTGTCCGAGAGGTT<br>R: AGCCTGGCATTAGCATGATGGA  |
| Mouse Fads2       | 56473                        | F: GATGGCTGCAACATGACTATGG<br>R: GCTGAGGCACCCTTAAGTGG    |
| Mouse PPARg       | 19016                        | F: GGAAGACCACTCGCATTCTT<br>R: GTAATCAGCAACCATGGGTCA     |
| Mouse Me1         | 17436                        | F: GCCGGCTCTATCCTCCTTTG<br>R: TTTGTATGCATCTTGACAACTCTT  |
| Mouse Lpin2       | 64898                        | F: CAGAGTTCAGACGTTTCTCACAC<br>R: GCTCCTTGATGCTCTTCTCCT  |
| Mouse Plin2       | 11520                        | F: CTGTGTCTCCTCCGCTTATGTC<br>R: GCAGAGGTCACGGTCTTCAC    |
| Mouse Cd36        | 12491                        | F: ATGGGCTGTGATCGAACTG<br>R: GTCTTCCCAATAAGCATGTCTCC    |
| Mouse Fsp27       | 14311                        | F: ATGGACTACGCCATGAAGTCT<br>R: CGGTGCTAACACGACAGGG      |
| Mouse Siah2       | 20439                        | F: CCAATGCCGCCAGAAGTTAAG<br>R: CAGGGAACAGAACTGCCGA      |
| Mouse Gapdh       | 14433                        | F: AGGTCGGTGTGAACGGATTG<br>R: TGTAAGACCATGTAGTTGAGGTCA  |
| Human FABP2       | 2169                         | F: ATGGCGTTTGACAGCACTTG<br>R: TCAGTTCCGCTGCTAGATTGTA    |
| Human FADS2       | 9415                         | F: GACCACGGCAAGAACTCAAAG<br>R: GAGGGTAGGAATCCAGCCATT    |
| Human LPIN2       | 9663                         | F: TCTACAAGGGCATTAAACCAGGC<br>R: AACGTGAAAAGGTGAACACTGA |
| Human PLIN2       | 123                          | F: TTGCAGTTGCCAATACCTATGC<br>R: CCAGTCACAGTAGTCGTCACA   |
| Human PPARG       | 5468                         | F: GGGATCAGCTCCGTGGATCT<br>R: TGCACTTTGGTACTCTTGAAGTT   |
| Human FSP27       | 63924                        | F: AAGTCCCTTAGCCTTCTCTACC<br>R: CCTTCCTCACGCTTCGATCC    |
| Human GAPDH       | 2597                         | F: CTGGGCTACACTGAGCACC<br>R: AAGTGGTCGTGAGGGCAATG       |
| Mouse/Human MKRN1 | Human: 23608<br>Mouse: 54484 | F: GAGCAGGTTTCAGAGGACTGG<br>R: CACTCTCCCACTGCAGCATA     |
| Human SIAH2       | 6478                         | F: CGCCAGAAGTTGAGCTGCT<br>R: TGGTGGCATACTTACAGGGAA      |
